# Supplementary material for: Comparison of Transcutaneous and Total Serum Bilirubin Measurements in Neonates With Jaundice: A Prospective Study From Nepal
Source: Research Square preprint supplement (doi:10.21203/rs.3.rs-8496085/v1), 2026-01-13
Supplement: Supplementary file 1 [file fa5272b703cac7c9100dd0f6.docx]

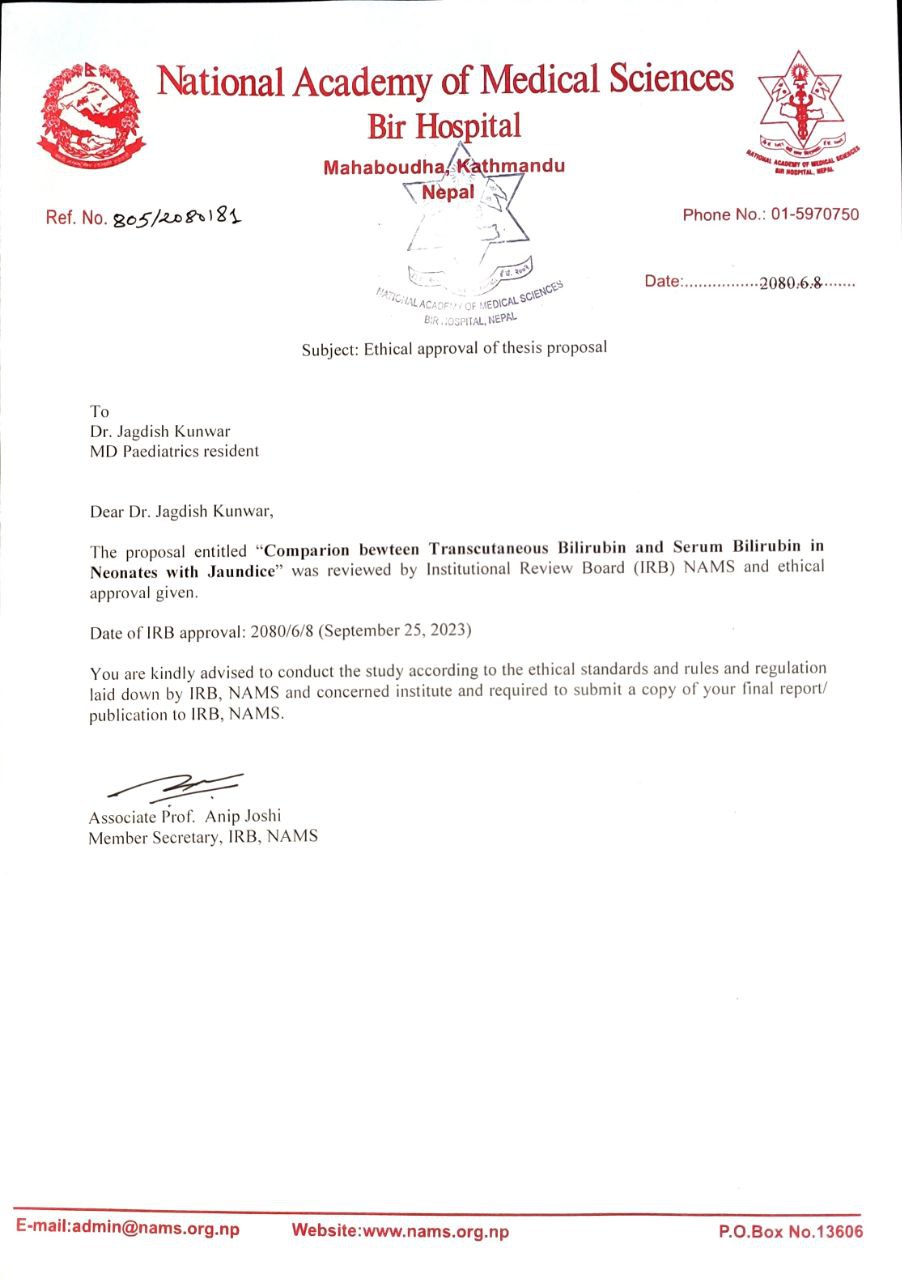


## INFORMED CONSENT SHEET

I hereby willingly give my consent to participate in the research entitled **“Comparison between Transcutaneous Bilirubin and Serum Bilirubin in Neonates with Jaundice”** being carried out by Dr.Jagdish Kunwar. I have been fully explained about the nature of this study, its purposes, all the procedures and its implications in the future. I have had opportunity to ask questions about it and any questions that I asked have been answered to my satisfaction. I consent voluntarily to participate as participant in this research and understand that I have right to withdraw for the research at any time without in any way affecting my medical care from the hospital.

| Right thumb | Left thumb |
| --- | --- |
|  |  |

**Father/Mother/Guardian**

Signature:

Name:

Relation:

Address:

Date: 2080 / /

##

## INFORMED CONSENT SHEET in Native language

## सुसूचित मन्जुरीनामा

म ______________________बिरामीको अभिभावकले डॉ जगदीश कुवरले गर्न लाग्नुभएको **“Comparison between Transcutaneous Bilirubin and Serum Bilirubin in Neonates with Jaundice”** शिर्षकको अनुसन्धान सम्बन्धी जानकारी पत्र/पुस्तिका' सुनेर/पढेर र प्रश्नोत्तर समेत गरेर प्राप्त भयो।

यो अनुसन्धान कार्यमा मेरो सहभागिता मेरो व्यक्तिगत इच्छामा भरपर्ने र मैले चाहेको खण्डमा कुनै पनि बेला यो अनुसन्धान प्रक्रियाबाट बाहिरिन पाउने भन्ने कुरा मैले बुझेको छु। यसको लागि मैले कुनै कारण दिनुनपर्ने र त्यसबाट मैले पाउने सेवा र मेरो कानुनी अधिकारमा असर नपर्ने समेत मलाई बुझाईएकोछ।

यस अनुसन्धानको प्रतिवेदन वा सम्बन्धित प्रकाशित कृतिहरुमा मेरो र बिरामीको कुनै व्यक्तिगत परिचय खुल्ने जानकारी प्रकाशित हुने छैन भन्ने कुरा मैले बुझेको छु।

| दायाँ | बायाँ |
| --- | --- |
|  |  |

यी सबै कुराहरु जानी-बुझी, मय सअध्ययन-अनुसन्धानमा सहभागी हुन स्वेच्छाले राजी भई यो सुसूचित मन्जुरीनामामा सहिछाप गरेको छु।

अभिभावकको बुढीऔंलाको ल्याप्चे

अभिभावकको सही:

अभिभावकको नामथर:

नाता:

ठेगाना :

मिति :

PROFORMA

**“Comparison between Transcutaneous Bilirubin and Serum Bilirubin in Neonates with Jaundice"**

**Paropakar Maternity and Women’s Hospital,**

**Thapathali, Kathmandu**

Study No: Date Of enrollment:

Date of Admission: Hospital ID Number:

Date and Time of Birth: Age(days)/Sex:

Birth History:-

LMP:

New Ballard Scoring (<96 Hours of age):

EDD from antenatal USG in first Trimester (If LMP Not available):

Weeks of Gestation: >37 weeks ( ) 34-37 weeks ( ) 28-34 weeks ( )

SGA( ) AGA( ) LGA( )

Birth Weight (in Grams):

Low Birth Weight ( ) Normal Birth Weight ( ) Macrosomia ( )

Transcutaneous Bilirubin(mg/dl):

| Reading 1 | | Reading 2 | | Reading 3 | | Average | | Average total |
| --- | --- | --- | --- | --- | --- | --- | --- | --- |
| FH | S | FH | S | FH | S | FH | S |  |
|  |  |  |  |  |  |  |  |

Total Serum Bilirubin(mg/dl):

Master Chart of Data

**
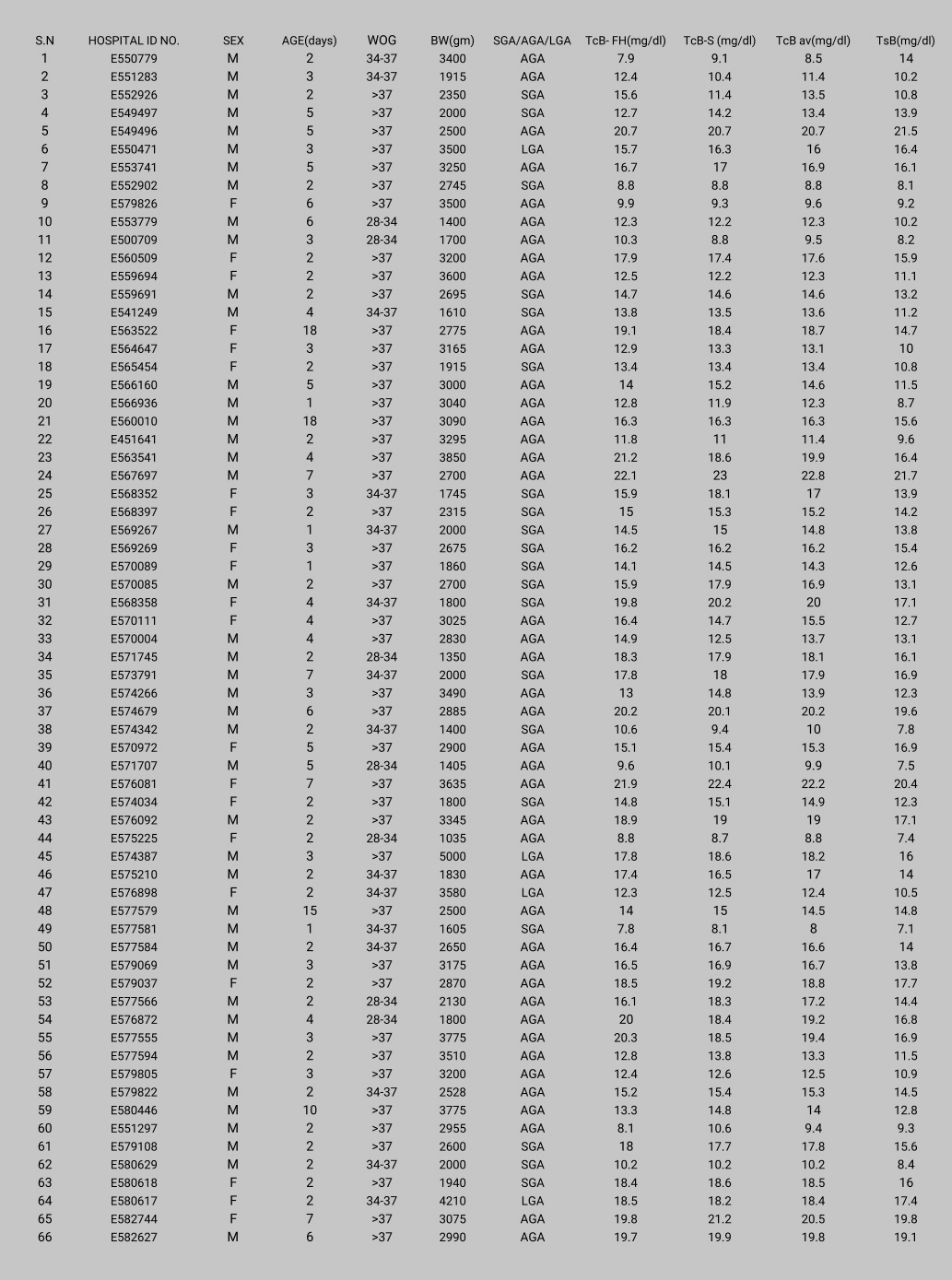
**


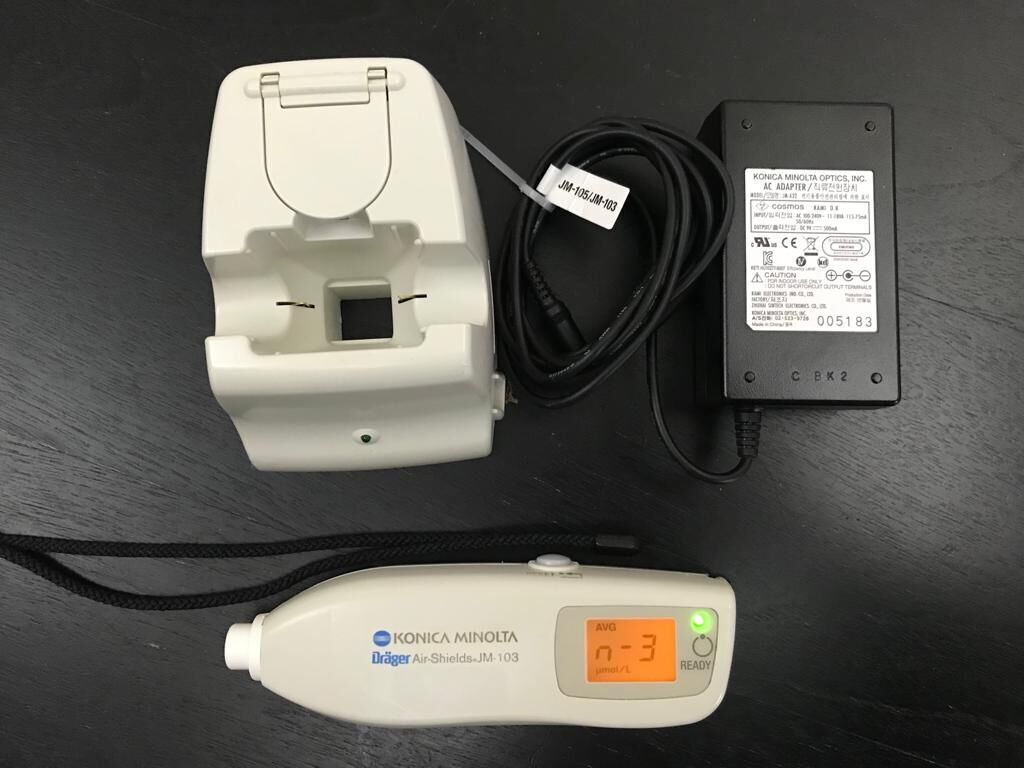


Figure: Konica Minolta Jm-103 bilirubinometer
